# Supplementary material for: Synthesis and Characterization of Calcium Silicate Nanoparticles Stabilized with Amino Acids
Source: MDPI journal article supplement (doi:10.3390/mi14020245), 2023-01-18
Supplement: s1 [file s1]

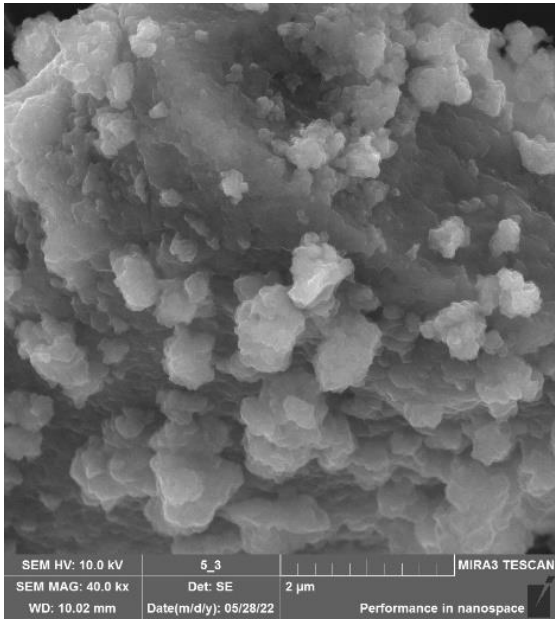

a

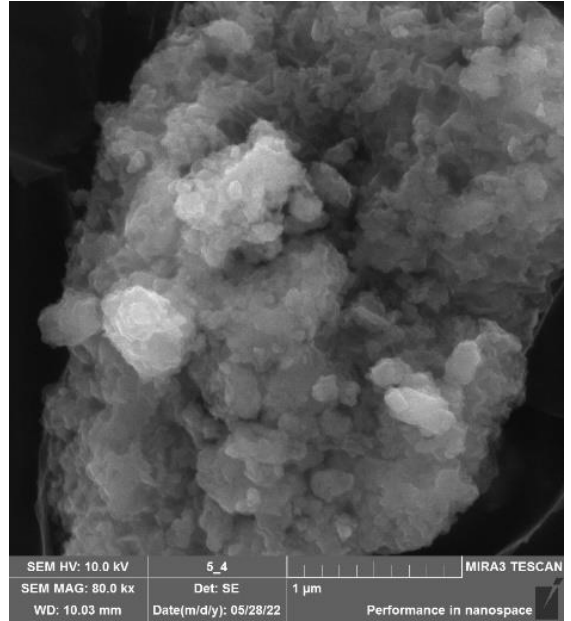

b

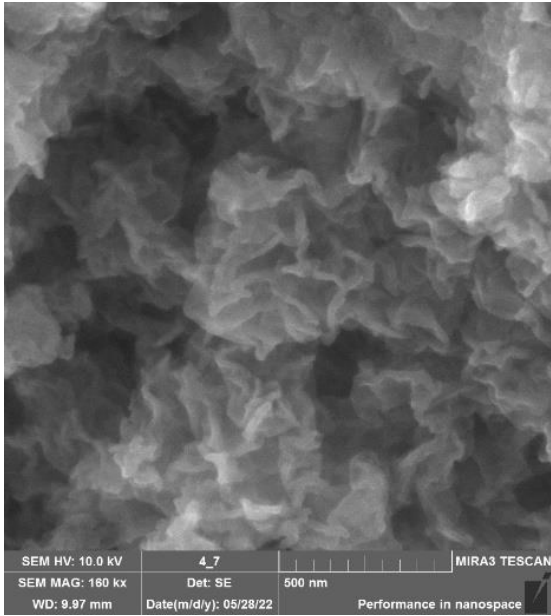

c

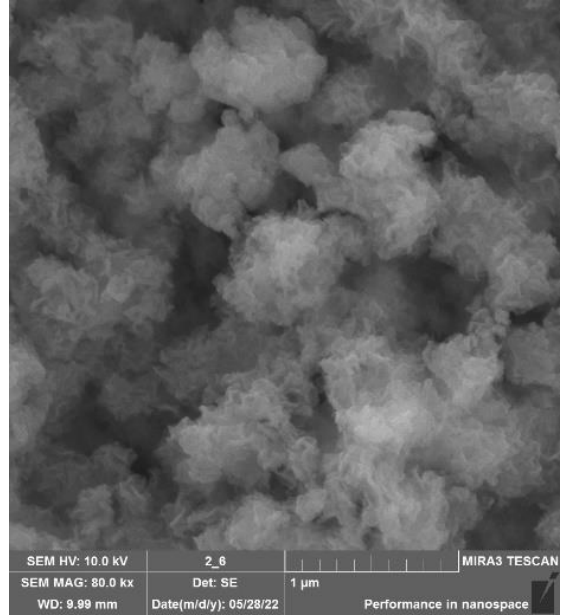

d

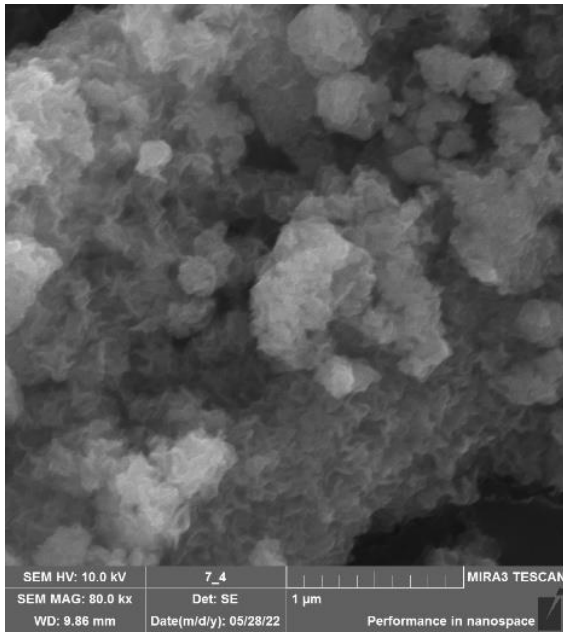

e

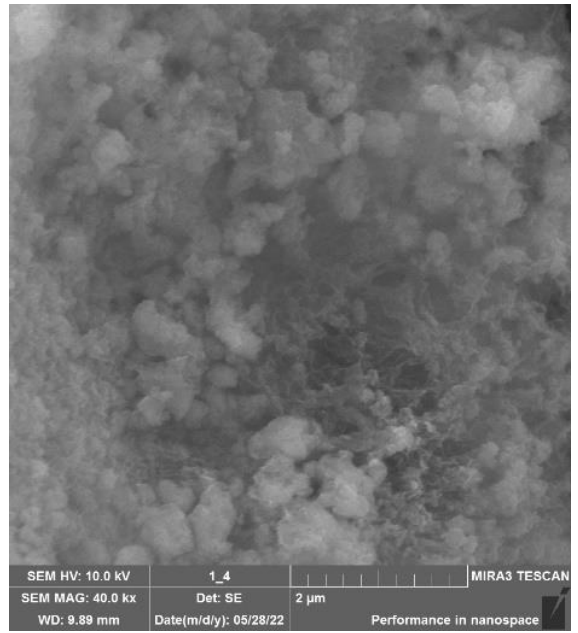

f

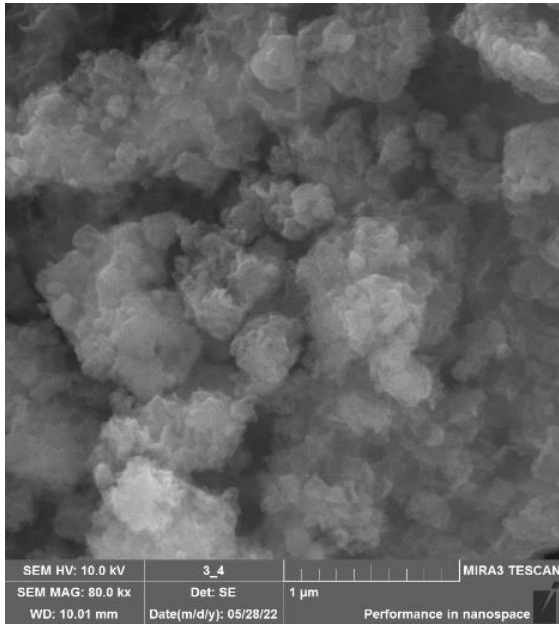

g

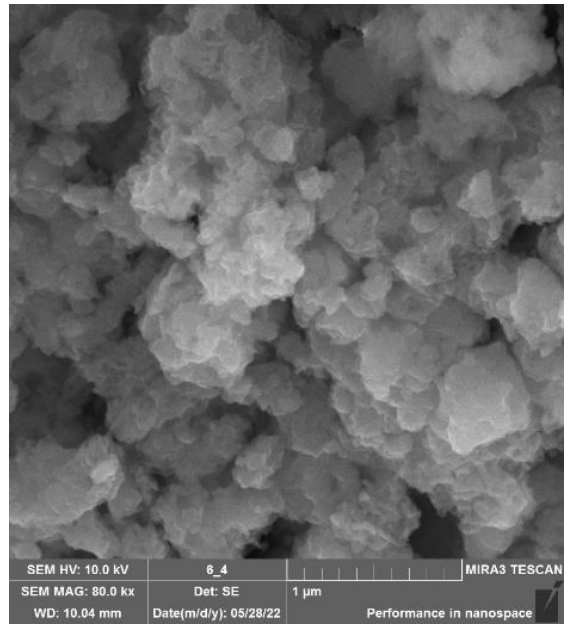

h

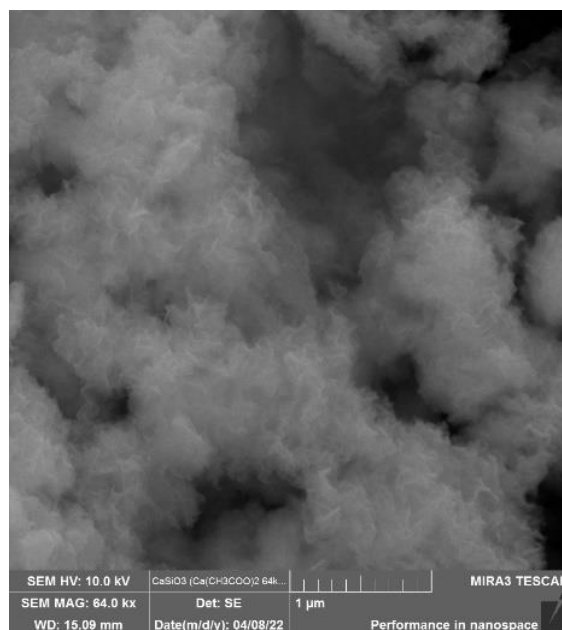

i

Figure S1. SEM micrographs of calcium silicate, stabilized with: a – L-valine, b – L-leucine, c – L-isoleucine, d – L-methionine, e – L-threonine, f – L-lysine, g – L-phenylalanine, h – L-tryptophan, i – without stabilizer.
